# Supplementary material for: The Hotel Study: Multimorbidity in a Community Sample Living in Marginal Housing
Source: Atypon-hosted journal article supplement (doi:10.1176/appi.ajp.2013.12111439), 2013-08-09

**Table ST1. Demographic and Clinical characteristics of Participants Who Died**

| Age | Sex | Concurrent or contributing illnesses                                                                                                                                                                                                 | Cause of death <sup>a</sup>                                                        |
|-----|-----|--------------------------------------------------------------------------------------------------------------------------------------------------------------------------------------------------------------------------------------|------------------------------------------------------------------------------------|
| 55  | M   | COPD, hypertension, hyperlipidemia                                                                                                                                                                                                   | Accidental drug overdose - cocaine                                                 |
| 50  | M   | None                                                                                                                                                                                                                                 | Accidental mixed drug intoxication - cocaine, morphine, methadone, methamphetamine |
| 44  | M   | Chronic alcohol consumption, respiratory failure, substance intoxication, chronic pancreatitis, HCV, seizure disorder, severe steatohepatitis, acute bronchopneumonia                                                                | Acute subdural hematoma due to blunt force head injury                             |
| 59  | M   | Respiratory failure, septic shock, acute kidney injury, DIC, COPD, hepatic dysfunction                                                                                                                                               | Pneumonia                                                                          |
| 43  | M   | Subarachnoid hemorrhage, cardiac arrest, HIV, chronic renal failure, chronic microcytic anemia, thrombocytopenia, remote AIDS dementia                                                                                               | Subarachnoid hemorrhage                                                            |
| 41  | M   | Recurring bronchopneumonia, recurrent infective endocarditis, remote tricuspid valve replacement, HCV, polysubstance abuse, chronic renal failure, adrenal insufficiency, severe peripheral vascular disease, dilated cardiomyopathy | Accidental mixed intoxication with cocaine and opioids                             |
| 52  | M   | Corneal ulcer, harmful use of alcohol                                                                                                                                                                                                | Natural disease process - pneumonia                                                |
| 57  | M   | Uremic encephalopathy, AIDS, bilateral renal cell cancer, chronic renal failure                                                                                                                                                      | Uremia                                                                             |
| 64  | M   | COPD, alcohol dependence, DVT/PE                                                                                                                                                                                                     | Metastatic non-small cell lung cancer                                              |
| 59  | F   | MSSA bacteremia, mitral valve endocarditis, atrial fibrillation, multiple embolic strokes, polyneuropathy, myelopathy, chronic renal disease secondary to sepsis, respiratory failure requiring tracheostomy                         | Multiple organ failure                                                             |
| 55  | M   | None                                                                                                                                                                                                                                 | Acute myelogenous leukemia                                                         |
| 47  | F   | HCV, MRSA infection, bipolar disorder                                                                                                                                                                                                | Accidental mixed drug intoxication - cocaine and methadone                         |

**Table ST1. Demographic and Clinical characteristics of Participants Who Died**

| Age | Sex | Concurrent or contributing illnesses                                                                 | Cause of death <sup>a</sup>                                                                              |
|-----|-----|------------------------------------------------------------------------------------------------------|----------------------------------------------------------------------------------------------------------|
| 59  | M   | HIV, HCV                                                                                             | Natural disease process - sepsis as a consequence of streptococcal pneumonia and bleeding duodenal ulcer |
| 39  | M   | Cryptococcal septicemia, HCV, cirrhosis, hepatic failure, bleeding esophageal varices, MRSA positive | Respiratory failure                                                                                      |
| 30  | F   | HCV, psychosis NOS, polysubstance abuse                                                              | Mixed drug toxicity - morphine, cocaine, methamphetamine                                                 |

<sup>a</sup> Hospital records were available from the year prior to death for 12/15 cases. Coroner's reports were obtained for 8 cases, including all who died outside of hospital.

**Table ST2. Substance Dependence and Mental Illness in Participants Living in Single Room Occupancy Hotels.**

| Clinical Characteristic                                       | At baseline (N=293) |      | Lifetime (N=293) |      |
|---------------------------------------------------------------|---------------------|------|------------------|------|
|                                                               | N                   | %    | N                | %    |
| <b>Substance dependence</b>                                   |                     |      |                  |      |
| Cocaine                                                       | 204                 | 69.6 | 234              | 79.9 |
| Methamphetamine                                               | 66                  | 22.5 | 92               | 31.4 |
| Heroin                                                        | 100                 | 34.2 | 171              | 58.4 |
| Other opioid                                                  | 757                 | 19.5 | 152              | 51.9 |
| Cannabis                                                      | 92                  | 31.4 | 123              | 42.0 |
| <b>Mental illness</b>                                         |                     |      |                  |      |
| Substance-induced psychosis                                   | 50                  | 17.1 | 78               | 26.6 |
| Schizophrenia                                                 | 21                  | 7.1  | 21               | 7.1  |
| Schizoaffective disorder                                      | 16                  | 5.5  | 16               | 5.5  |
| Bipolar with psychosis                                        | 9                   | 3.1  | 12               | 4.1  |
| Major depression with psychosis                               | 2                   | 0.7  | 9                | 3.1  |
| Delusional disorder                                           | 1                   | 0.3  | 2                | 0.7  |
| Psychosis Not Otherwise Specified                             | 38                  | 13.0 | 42               | 14.3 |
| Psychosis due to a general medical condition <sup>a</sup>     | 2                   | 0.7  | 3                | 1.0  |
| Substance-induced mood disorder                               | 16                  | 5.5  | 36               | 12.3 |
| Bipolar-I                                                     | 14                  | 4.8  | 19               | 6.5  |
| Bipolar-II                                                    | 4                   | 1.4  | 10               | 3.4  |
| Major depression                                              | 48                  | 16.4 | 84               | 28.7 |
| Dysthymia                                                     | 4                   | 1.4  | 8                | 2.7  |
| Mood disorder due to a general medical condition <sup>b</sup> | 1                   | 0.3  | 4                | 1.4  |
| Panic disorder                                                | 26                  | 8.9  | 44               | 15.0 |
| Agoraphobia                                                   | 8                   | 2.7  | 20               | 6.8  |
| Generalized anxiety disorder                                  | 19                  | 6.5  | 19               | 6.5  |
| Social phobia                                                 | 12                  | 4.1  | 12               | 4.1  |
| Post-traumatic stress disorder                                | 27                  | 9.2  | 37               | 12.6 |
| Obsessive-compulsive disorder                                 | 7                   | 2.4  | 7                | 2.4  |

<sup>a</sup> Baseline: post-anoxic, interferon-related, n=1 each; lifetime: post-anoxic, traumatic brain injury related, anti-retroviral treatment-related, n=1 each

<sup>b</sup> Baseline: interferon-related (n=1); lifetime: interferon-related, spinal cord abscess, traumatic brain injury, toxin exposure related n=1 each

**Table ST3. Neurological Findings.**

| Finding                                       | Total N | N  | %    |
|-----------------------------------------------|---------|----|------|
| <b>Movement disorder</b>                      |         |    |      |
| Drug associated                               | 269     | 49 | 18.2 |
| Other <sup>a</sup>                            | 269     | 3  | 1.1  |
| <b>Any brain infarction on MRI</b>            |         |    |      |
| Lacunar infarction                            | 232     | 15 | 6.5  |
| Cerebellar infarction                         | 232     | 7  | 3.0  |
| Subcortical infarction                        | 232     | 2  | 0.9  |
| Cortical infarction                           | 232     | 4  | 1.7  |
| Hemorrhage                                    | 232     | 1  | 0.4  |
| <b>Clinical cognitive impairment (DSM-IV)</b> |         |    |      |
| Amnesic disorder                              | 293     | 1  | 0.3  |
| Dementia                                      | 293     | 4  | 1.4  |
| Cognitive disorder not otherwise specified    | 293     | 14 | 4.8  |

<sup>a</sup> Huntington's, HIV/AIDS-Parkinsonism, idiopathic akathisia (n=1 each)

**Table ST4. Hepatitis C (n=272 with all APRI Data)\***

|                                  | anti-HCV positive<br>viremia positive (N=145) |                        | anti-HCV positive<br>viremia negative (N=45) |                        | anti-HCV negative<br>(N=82) |                        | All (N=272) |                        |
|----------------------------------|-----------------------------------------------|------------------------|----------------------------------------------|------------------------|-----------------------------|------------------------|-------------|------------------------|
|                                  | N                                             | %                      | N                                            | %                      | N                           | %                      | N           | %                      |
| anti-HIV positive                | 37                                            | 25.5                   | 10                                           | 22.2                   | 4                           | 4.9                    | 51          | 18.8                   |
| anti-HBc positive                | 78                                            | 53.8                   | 31                                           | 68.9                   | 7                           | 8.5                    | 116         | 42.6                   |
| HBV surface antigen positive     | 0                                             | 0.0                    | 3                                            | 6.7                    | 0                           | 0.0                    | 3           | 1.1                    |
|                                  | Median                                        | Interquartile<br>range | Median                                       | Interquartile<br>range | Median                      | Interquartile<br>range | Median      | Interquartile<br>range |
| Platelets (10 <sup>9</sup> /L)   | 236                                           | 175-285                | 250                                          | 212-301                | 294                         | 252-335                | 255         | 203-307                |
| Aspartate aminotransferase (U/L) | 39                                            | 28-59                  | 26                                           | 21-32                  | 21                          | 18-25                  | 29          | 21-45                  |
| Alanine aminotransferase (U/L)   | 42                                            | 27-68                  | 175-285                                      | 14-27                  | 18-25                       | 14-25                  | 27          | 17-47                  |
|                                  | N                                             | %                      | N                                            | %                      | N                           | %                      | N           | %                      |
| <b>APRI</b>                      |                                               |                        |                                              |                        |                             |                        |             |                        |
| ≤0.70                            | 98                                            | 67.6                   | 40                                           | 88.9                   | 80                          | 97.6                   | 218         | 80.2                   |
| 0.71 - 1.50                      | 28                                            | 19.3                   | 3                                            | 6.7                    | 2                           | 2.4                    | 33          | 12.1                   |
| 1.51 - 2.00                      | 9                                             | 6.2                    | 1                                            | 2.2                    | 0                           | 0.0                    | 10          | 3.7                    |
| >2.00                            | 10                                            | 6.9                    | 1                                            | 2.2                    | 0                           | 0.0                    | 11          | 4.0                    |

\* APRI: Aspartate aminotransferase:platelet ratio index, calculated with local laboratory upper limit of normal = 35, limited to anti-HCV positive as predictive value of the index is best evaluated in this population. Values >0.7 are associated with hepatic fibrosis, >2 with hepatic cirrhosis. IQR: interquartile range

**Table ST5. HIV/AIDS Assessment and Treatment History<sup>a</sup>**

| Characteristic                                             | N       | Median | Interquartile range |
|------------------------------------------------------------|---------|--------|---------------------|
| Age (yr)                                                   | 52      | 45.3   | 39.5-51.3           |
| Age at starting injection drug use (yr)                    | 48      | 20.5   | 15.3-26.8           |
| Age at starting antiretroviral therapy (yr)                | 47      | 37     | 32-46               |
| Hotel Study start baseline viral load (c/mL)               | 47      | 35     | 35-54               |
| Hotel Study start baseline CD4 (cells/mm <sup>3</sup> )    | 47      | 320    | 230-500             |
| Follow-up time from anti-retroviral treatment start (mon)  | 47      | 90     | 41-147              |
|                                                            | Total N | N      | %                   |
| Female sex                                                 | 52      | 17     | 32.7                |
| Injection drug users                                       | 52      | 49     | 94.2                |
| Ever achieved virologic suppression <sup>b</sup>           | 47      | 42     | 89.4                |
| Start of anti-retroviral treatment                         |         |        |                     |
| During or before 1996                                      | 47      | 3      | 6.4                 |
| 1997-1999                                                  | 47      | 16     | 34.0                |
| During or after 2000                                       | 47      | 28     | 59.6                |
| AIDS diagnosed prior to starting anti-retroviral treatment | 47      | 7      | 14.9                |
| Therapy type at naive start                                |         |        |                     |
| Mono drug therapy                                          | 47      | 2      | 4.2                 |
| Double drug therapy                                        | 47      | 6      | 12.8                |
| Triple drug therapy                                        |         |        |                     |
| Single protease inhibitors                                 | 47      | 4      | 8.5                 |
| Boosted protease inhibitors                                | 47      | 10     | 21.3                |
| Non-Nucleoside reverse transcriptase inhibitors            | 47      | 22     | 46.8                |
| Others                                                     | 47      | 3      | 6.4                 |
| Adherence >95% in year 1                                   | 46      | 21     | 45.7                |

<sup>a</sup> Treatment History: complete data available for 47/52 HIV+

<sup>b</sup> Virologic suppression: plasma viral load of <50 c/mL at least twice consecutively

**Figure S1. MRI examples of participants with traumatic brain injury.**

- A. 33 year old male with TBI (age unknown) akathisia related to crack cocaine use, cocaine (crack) and cannabis dependence, schizoaffective disorder
- B. 48 year old female with TBI at age 20, dependent on cocaine (crack and injection), with psychosis (PNOS). Cleared HCV infection.
- C. 53 year old male with TBI age 35, persistent seizure disorder, cognitive disorder (NOS), cocaine (crack) and heroin dependence, HCV and HIV



**A**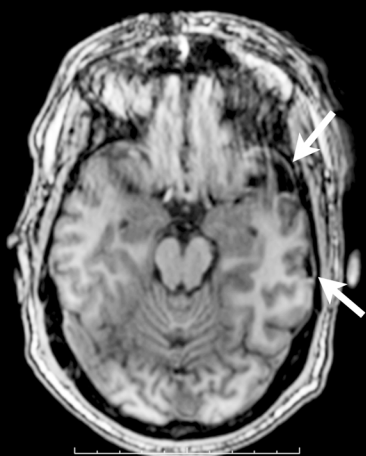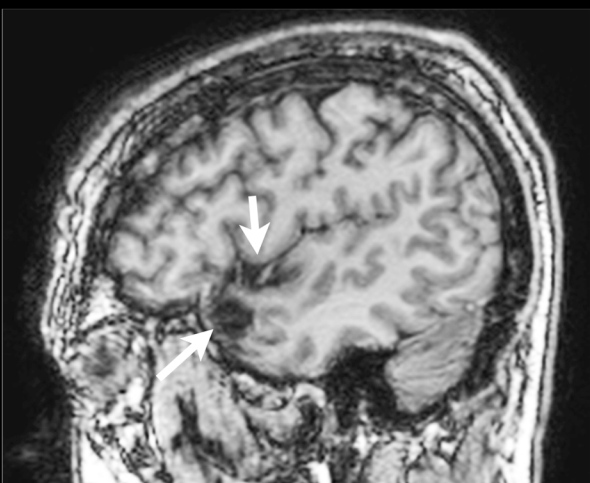**B**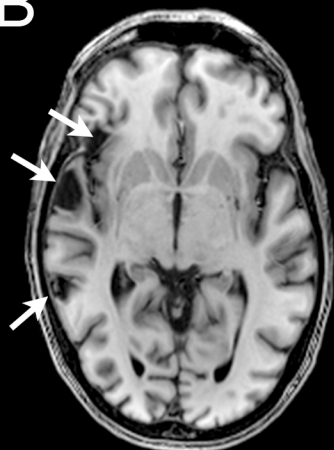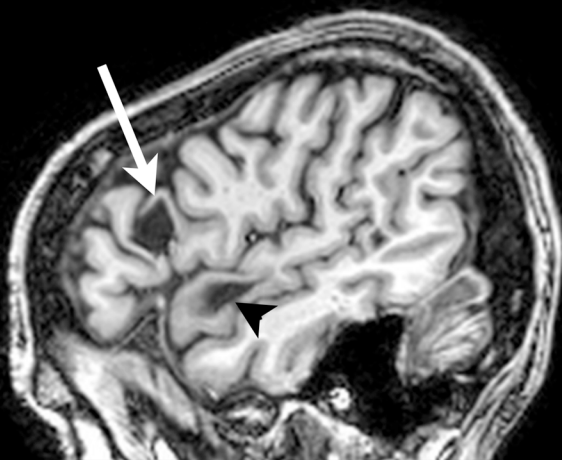**C**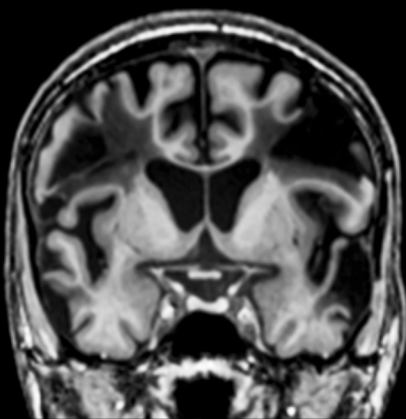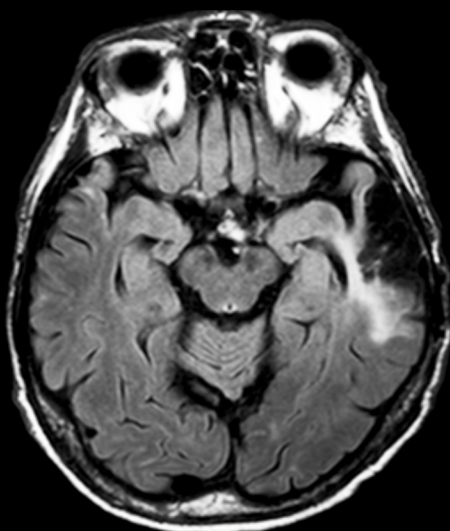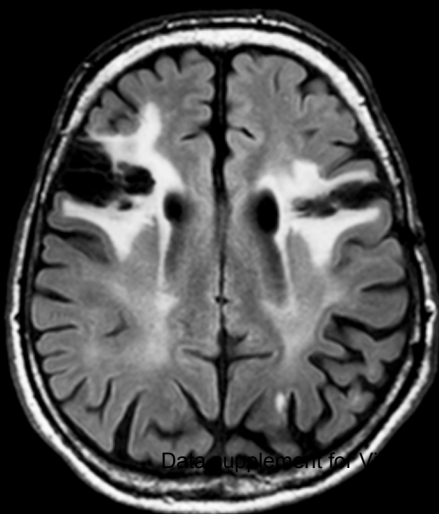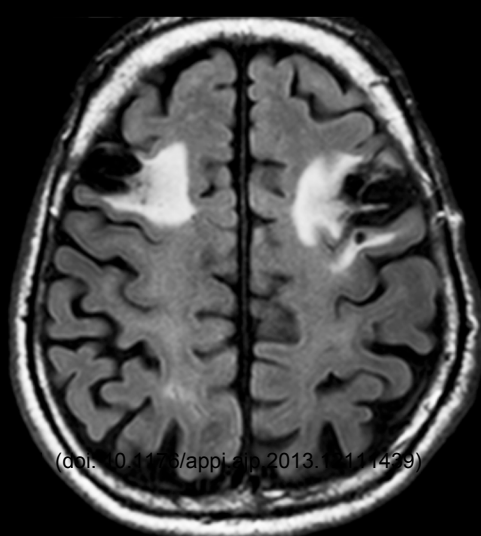

Supplement: 1413_ds001.pdf [file 1413_ds001.pdf]
